# Supplementary material for: Normal Human Pluripotent Stem Cell Lines Exhibit Pervasive Mosaic Aneuploidy
Source: PLOS journal article supplement (doi:10.1371/journal.pone.0023018), 2011-08-16
Supplement: S1 (10.1371/journal.pone.0023018.s001) [file journal.pone.0023018.s001]

Peterson - Supplemental Figure 1

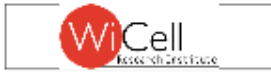

**WiCell Cytogenetics Report: 001680-041010**

**Report Date:** April 13, 2010

**Case Details:**

**Cell Line:** WA09

**Passage #:** 68

**Date Completed:** 4/13/2010

**Cell Line Gender:** Female

**Investigator:** Suzanne Peterson

**Specimen:** hESC on MEF feeder

**Date of Sample:** 4/8/2010

**Tests, Reason for:** Routine Testing

**Results:** 46,XX

*Completed by Kim Leonhard, CG(ASCP), on 4/13/2010*

*Reviewed and interpreted by Karen Dyer Montgomery, PhD, FACMG, on 4/13/2010*

**Interpretation:** No abnormalities were detected at the stated band level of resolution.

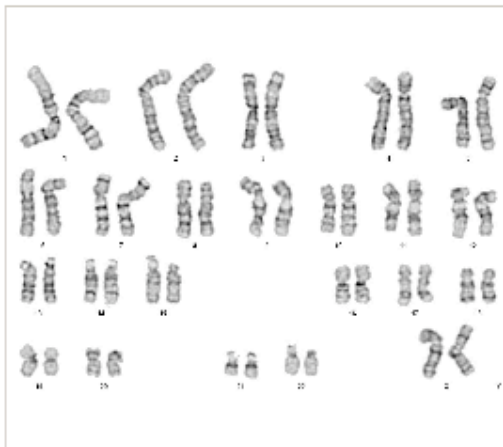

**Cell:** S01-01

**Slide:** A-2

**Slide Type:** Karyotyping

**# of Cells Counted:** 20

**# of Cells Karyotyped:** 4

**# of Cells Analyzed:** 8

**Band Level:** 425-575

**Results Transmitted by Fax / Email / Post**

**Sent By:** \_\_\_\_\_

**QC Review By:** \_\_\_\_\_

**Date:** \_\_\_\_\_

**Sent To:** \_\_\_\_\_

**Results Recorded:** \_\_\_\_\_
